# Supplementary material
Source: Springer Nature journal article supplement (https://www.springermedizin.de/resource/supplementary/12881_2009_476_MOESM1_ESM.pdf/9450740)

**A**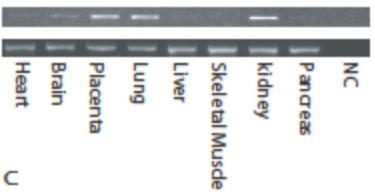**B**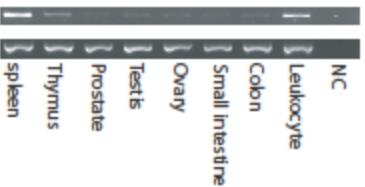**C**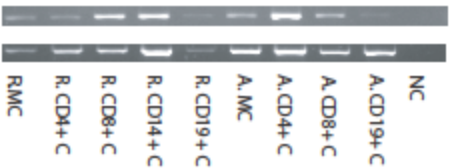

TIM3 32 cycles

G3PDH 28cycles

Supplement: MOESM1 [file 9450740]
